# Supplementary material
Source: PubMed Central journal article supplement (PMC2711742)
Supplement: 01130.2008_4.pdf [file 01130.2008_4.pdf]

Supplemental Figure 1: Western blots from rat brain extract (Brain), middle cerebral artery (MCA), and carotid artery (CA). The numbers at the top of the blots indicate different samples loaded. Total protein loaded for each gel was 2  $\mu$ g (Brain), 8  $\mu$ g (MCA), and 4  $\mu$ g (CA). TRPC6 antibody (Sigma) was incubated overnight at 4 °C with rocking. The antibody dilution was 1:800 (Brain), 1:500 (MCA), and 1:300 (CA). Secondary antibody (goat anti-rabbit HRP) was incubated at 1:10,000 for one hour at RT before detection by chemilluminescence.

Supplemental Figure 2: Co-immunoprecipitation of TRPC1 and TRPC3 from rat CA smooth muscle cells (CASMC). Total protein was extracted from CASMC that had been passaged 3 to 4 times. Protein was immunoprecipitated with anti-TRPC3 and the membrane probed with anti-TRPC1.

Supplemental Figure 3: Summary I-V plots showing in response to OAG (100  $\mu$ M) in rat CA SMC. Data are presented as mean and standard error of the mean with n=4.
