# Supplementary material
Source: PubMed Central journal article supplement (PMC2711742)

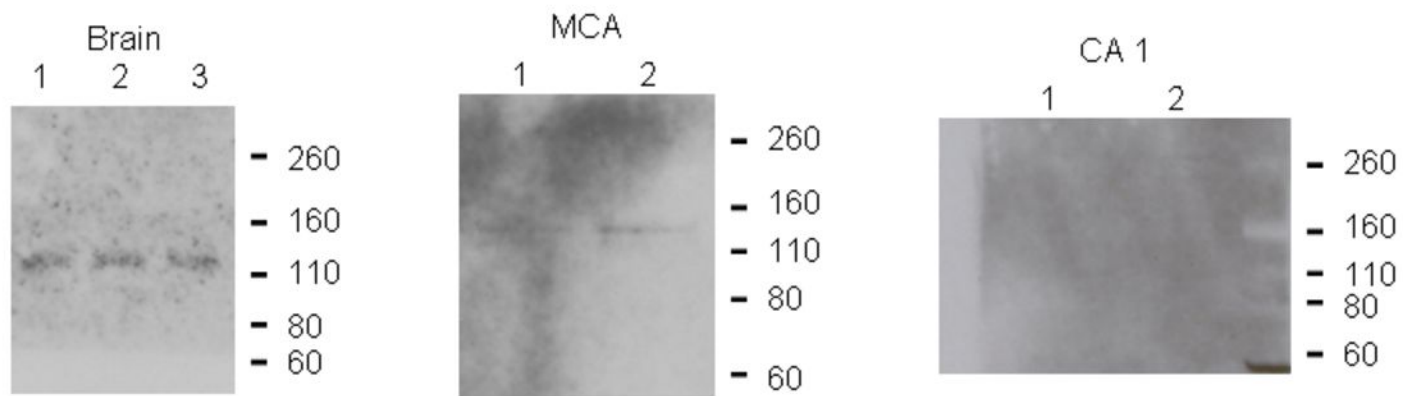

Supplemental Figure 1

Supplement: 01130.2008_1.pdf [file 01130.2008_1.pdf]

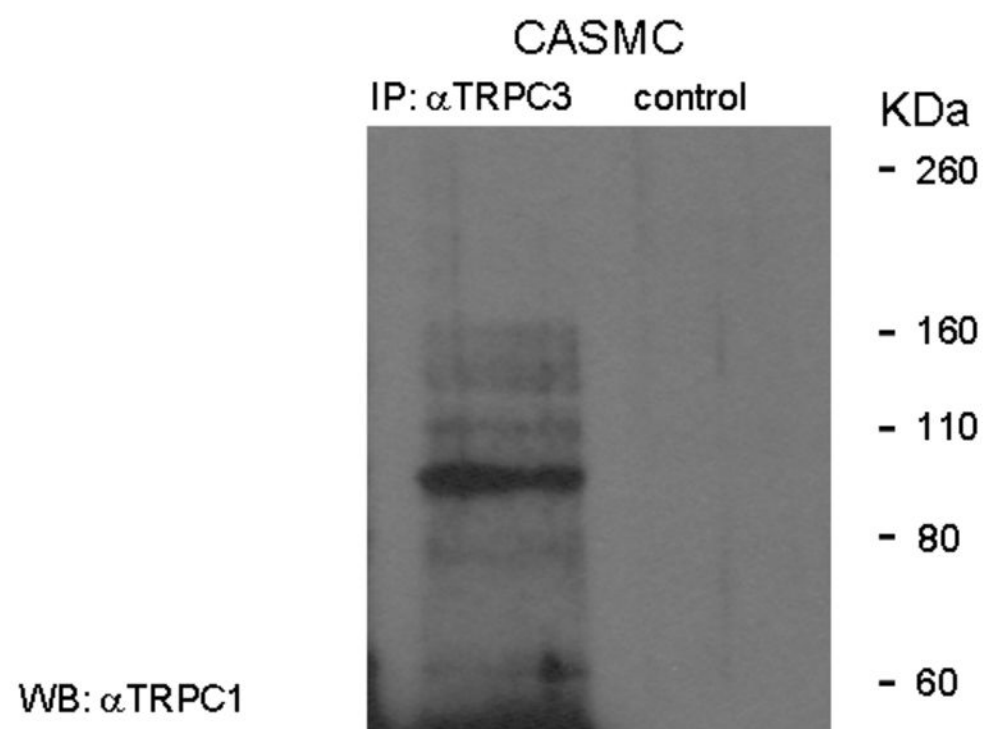

Supplement: 01130.2008_2.pdf [file 01130.2008_2.pdf]

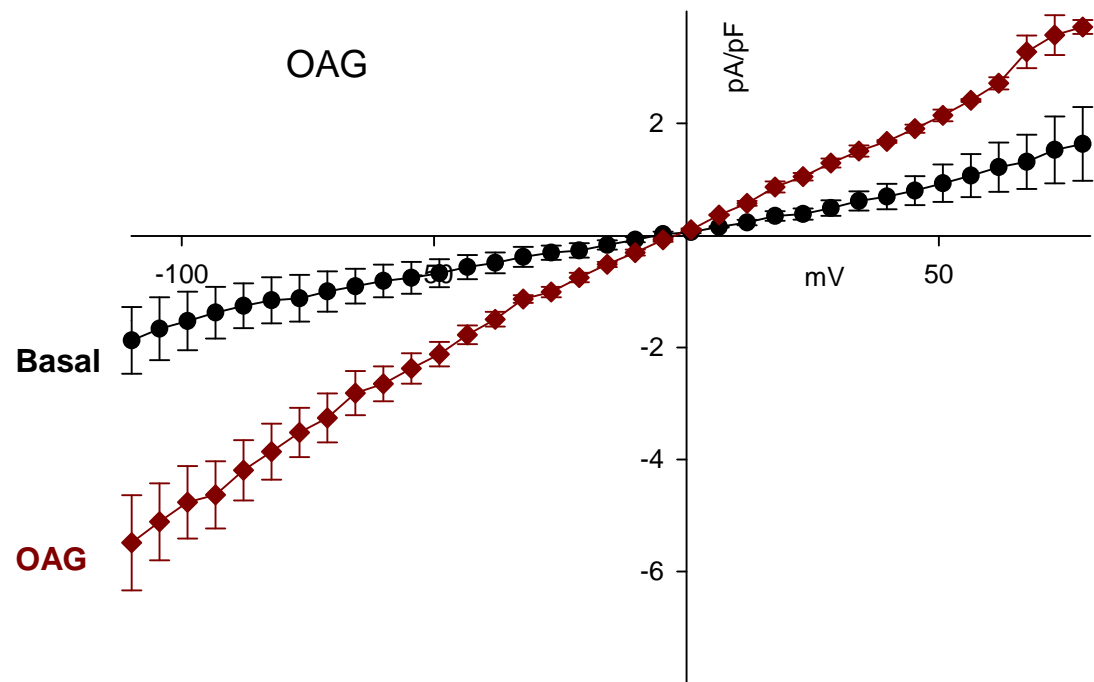

Supplemental Figure 3

Supplement: 01130.2008_3.pdf [file 01130.2008_3.pdf]
